# Supplementary material for: European and Mediterranean Myzocallidini Aphid Species: DNA Barcoding and Remarks on Ecology with Taxonomic Modifications in An Integrated Framework
Source: MDPI journal article supplement (doi:10.3390/insects13111006), 2022-11-01
Supplement: s1 [file s1]

**Table S1.** Host plants, sampling date, geographical coordinates, voucher numbers, BIN and Genebank accession number of *Myzocallis* spp. analysed.

| Species                   | Host plant                | Sampling date | Location                | long/lat     | Voucher number | GeneBank accession |
|---------------------------|---------------------------|---------------|-------------------------|--------------|----------------|--------------------|
| <i>Myzocallis carpini</i> | <i>Carpinus betulus</i>   | 31 May 2017   | Piemonte, Italy         | 49.35/1.02   | MYZ/728        | OP143871           |
| <i>M. carpini</i>         | <i>C. betulus</i>         | 23 Oct 2017   | Piemonte, Italy         | 45.05/7.68   | MYZ /753       | OP143872           |
| <i>M. occidentalis</i>    | <i>Quercus. pyrenaica</i> | 5 May 2018    | Castile and León, Spain | 42.66/-5.47  | MYZ /811       | OP143877           |
| <i>M. occidentalis</i>    | <i>Q. pyrenaica</i>       | 11 Nov 2017   | Castile and León, Spain | 42.67/-5.47  | MYZ /767       | OP143880           |
| <i>M. occidentalis</i>    | <i>Q. pyrenaica</i>       | 11 Nov 2017   | Castile and León, Spain | 42.66/-5.48  | MYZ /768       | OP143879           |
| <i>M. occidentalis</i>    | <i>Q. pyrenaica</i>       | 21 Nov 2017   | Castile and León, Spain | 42.66/-5.46  | MYZ /776       | OP143878           |
| <i>M. glandulosa</i>      | <i>Q. ithaburensis</i>    | 15 May 2019   | Neve Yaar, Israel       | 32.70/35.17  | MYZ /832       | OP143890           |
| <i>M. schreiberei</i>     | <i>Quercus. x crenata</i> | 12 Oct 2017   | Piemonte, Italy         | 45.08/7.63   | MYZ /748       | OP143885           |
| <i>M. schreiberei</i>     | <i>Q. suber</i>           | 27 Nov 2017   | Sicily, Italy           | 38.11/13.37  | MYZ /765       | OP143887           |
| <i>M. schreiberei</i>     | <i>Q. ilex</i>            | 1 Apr 2019    | Sicily, Italy           | 37.21/14.84  | MYZ /823       | OP143886           |
| <i>M. schreiberei</i>     | <i>Q. suber</i>           | 11 Apr 2019   | Sicily, Italy           | 37.10/14.50  | MYZ /826       | OP143884           |
| <i>M. schreiberei</i>     | <i>Q. suber</i>           | 11 Apr 2019   | Sicily, Italy           | 37.09/14.50  | MYZ /828       | OP143881           |
| <i>M. macrolepidis</i>    | <i>Quercus macrolepis</i> | 28 May 2017   | Apulia, Italy           | 39.92/18.37  | MYZ /713       | OP143892           |
| <i>M. macrolepidis</i>    | <i>Q. macrolepis</i>      | 11 May 2018   | Apulia, Italy           | 39.92/18.38  | MYZ /790       | OP143893           |
| <i>M. boernerii</i>       | <i>Quercus cerris</i>     | 14 June 2017  | Sicily, Italy           | 37.77/15.09  | MYZ /719       | OP143873           |
| <i>M. boernerii</i>       | <i>Q. cerris</i>          | 14 June 2017  | Sicily, Italy           | 37.73/15.10  | MYZ /725       | OP143876           |
| <i>M. coryli</i>          | <i>Corylus avellana</i>   | 26 May 2017   | Sicily, Italy           | 37.79/14.82  | MYZ /712       | OP143869           |
| <i>M. coryli</i>          | <i>C. avellana</i>        | 14 Jun 2017   | Sicily, Italy           | 37.83/14.77  | MYZ /724       | OP143870           |
| <i>M. coryli</i>          | <i>C. avellana</i>        | 26 Dec 2017   | Franklin, South Africa  | -30.35/29.46 | MYZ /779       | OP143866           |
| <i>M. coryli</i>          | <i>C. avellana</i>        | 19 Jun 2017   | Copenhagen, Denmark     | 55.68/12.56  | MYZ /815       | OP143867           |
| <i>M. coryli</i>          | <i>C. americana</i>       | 28 Jun 2018   | Sicily, Italy           | 38.11/13.77  | MYZ /817       | OP143868           |
| <i>M. castanica</i>       | <i>Q. cerris</i>          | 17 May 2007   | Sardinia, Italy         | 40.33/8.95   | MYZ/699        | OP143817           |
| <i>M. castanica</i>       | <i>Q. petraea</i>         | 26 May 2018   | Piemonte, Italy         | 45.08/7.33   | MYZ/803        | OP143815           |
| <i>M. castanica</i>       | <i>Q. petraea</i>         | 31 Oct 2017   | Piemonte, Italy         | 45.09/7.34   | MYZ/749        | OP143813           |
| <i>M. castanica</i>       | <i>Quercus pubescens</i>  | 2 Jun 2018    | Piemonte, Italy         | 45.10/7.45   | MYZ/805        | OP143814           |
| <i>M. castanica</i>       | <i>Q. pyrenaica</i>       | 21 Nov 2017   | Castile and León, Spain | 42.66/-5.47  | MYZ/774        | OP143919           |

|                                |                            |              |                         |             |         |          |
|--------------------------------|----------------------------|--------------|-------------------------|-------------|---------|----------|
| <i>M. castanicola</i>          | <i>Q. pyrenaica</i>        | 15 May 2018  | Castile and León, Spain | 42.66/-5.47 | MYZ/799 | OP143918 |
| <i>M. castanicola</i>          | <i>Q. pyrenaica</i>        | 5 May 2018   | Castile and León, Spain | 42.5/-5.49  | MYZ/812 | OP143816 |
| <i>M. leclanti</i>             | <i>Castanea sativa</i>     | 13 Jun 2017  | Sicily, Italy           | 37.69/14.93 | MYZ/717 | OP143921 |
| <i>M. leclanti</i>             | <i>C. sativa</i>           | 14 Jun 2017  | Sicily, Italy           | 37.69/14.93 | MYZ/720 | OP143920 |
| <i>M. leclanti</i>             | <i>C. sativa</i>           | 17 May 2017  | Piemonte, Italy         | 45.07/7.36  | MYZ/746 | OP143922 |
| <i>M. miricae</i>              | <i>Myrica gale</i>         | 20 Sept 2019 | Galicia, Spain          | 43.00/-8.92 | MYZ/822 | OP143811 |
| <i>M. cocciferina</i>          | <i>Quercus coccifera</i>   | 15 Jun 2017  | Sicily, Italy           | 36.93/14.53 | MYZ/727 | OP143809 |
| <i>M. cocciferina</i>          | <i>Q. coccifera</i>        | 11 May 2018  | Apulia, Italy           | 40.94/16.94 | MYZ/795 | OP143908 |
| <i>M. cocciferina</i>          | <i>Q. ilex x coccifera</i> | 25 May 2017  | Sicily, Italy           | 37.51/15.08 | MYZ/709 | OP143905 |
| <i>M. cocciferina</i>          | <i>Q. ilex</i>             | 5 Jul 2017   | Sicily, Italy           | 37.88/15.13 | MYZ/741 | OP143904 |
| <i>M. cocciferina</i>          | <i>Q. ilex x coccifera</i> | 5 May 2018   | Sicily, Italy           | 37.51/15.08 | MYZ/782 | OP143906 |
| <i>M. mediterranea</i>         | <i>Quercus pubescens</i>   | 17 Jun 2017  | Sicily, Italy           | 37.83/15.13 | MYZ/740 | OP143896 |
| <i>M. mediterranea</i>         | <i>Q. pubescens</i>        | 8 May 2018   | Sicily, Italy           | 37.57/15.11 | MYZ/783 | OP143895 |
| <i>M. mediterranea</i>         | <i>Q. pubescens</i>        | 8 May 2018   | Sicily, Italy           | 37.62/15.07 | MYZ/784 | OP143894 |
| <i>M. mediterranea</i>         | <i>Q. pubescens</i>        | 8 May 2018   | Sicily, Italy           | 37.58/15.11 | MYZ/785 | OP143897 |
| <i>M. komareki</i>             | <i>Q. macrolepis</i>       | 28 May 2017  | Apulia, Italy           | 39.92/18.38 | MYZ/714 | OP143903 |
| <i>M. komareki</i>             | <i>Q. cerris</i>           | 17 May 2017  | Piemonte, Italy         | 45.05/7.37  | MYZ/735 | OP143901 |
| <i>M. komareki</i>             | <i>Q. petraea</i>          | 31 Oct 2017  | Piemonte, Italy         | 45.09/7.35  | MYZ/754 | OP143902 |
| <i>M. komareki</i>             | <i>Q. trojana</i>          | 27 Nov 2019  | Sicily, Italy           | 38.11/13.37 | MYZ/793 | OP143898 |
| <i>M. walshii</i>              | <i>Quercus rubra</i>       | 31 May 2017  | Sicily, Italy           | 45.08/7.63  | MYZ/733 | OP143928 |
| <i>M. walshii</i>              | <i>Q. rubra</i>            | 22 Jul 2017  | Katowice, Poland        | 50.26/19.03 | MYZ/760 | OP143927 |
| <i>Tuberculatus eggleri</i>    | <i>Q. pubescens</i>        | 13 Jun 2017  | Sicily, Italy           | 37.66/14.96 | TUB/716 | OP143923 |
| <i>T. neglectus</i>            | <i>Q. petraea</i>          | 31 Oct 2017  | Piemonte, Palermo       | 45.09/7.35  | TUB/751 | OP143924 |
| <i>T. remaudieri</i>           | <i>Q. pyrenaica</i>        | 21 Nov 2017  | Castile and León, Spain | 42.66/-5.47 | TUB/771 | OP143925 |
| <i>Apulicallis trojanae</i>    | <i>Q. trojana</i>          | 10 May 2018  | Apulia, Italy           | 40.67/17.22 | APU/788 | OP143888 |
| <i>Siculaphis vittoriensis</i> | <i>Q. ilex</i>             | 1 Apr 2019   | Sicily, Italy           | 37.21/14.84 | SIC/823 | OP143889 |
| <i>Hoplocallis rupertii</i>    | <i>Q. macrolepis</i>       | 27 Nov 2019  | Sicily, Italy           | 38.11/13.37 | HOP/762 | OP143926 |
